# Supplementary material for: A human mitofusin 2 mutation can cause mitophagic cardiomyopathy
Source: eLife. 2023 Nov 1;12:e84235. doi: 10.7554/eLife.84235 (PMC10619978; doi:10.7554/eLife.84235)
Supplement: Figure 1—source data 1. — Red font indicates variants found in CM. [file elife-84235-fig1-data1.xlsx]

## Sheet: Sheet1
Position	rsIDs	Reference	Alternate	HGVS Consequence	Protein Consequence	Transcript Consequence	VEP Annotation	ClinVar Clinical Significance	Allele Frequency
Supplemental Table. gnomAD MFN2 coding variants. Red font indicates variants found in CM.
12049230	rs758996830	C	T	p.Ser2Phe	p.Ser2Phe	c.5C>T	missense_variant		7.07089e-06
12049235	rs764758724	C	T	p.Leu4Phe	p.Leu4Phe	c.10C>T	missense_variant		3.97681e-06
12049238	rs1222894986	T	C	p.Phe5Leu	p.Phe5Leu	c.13T>C	missense_variant		3.18512e-05
12049245	rs1296772735	G	T	p.Arg7Leu	p.Arg7Leu	c.20G>T	missense_variant		3.97662e-06
12049247	rs1342700068	T	C	p.Cys8Arg	p.Cys8Arg	c.22T>C	missense_variant	Uncertain significance/ Charcot-Marie-Tooth disease, type 2	3.9764e-06
12049249	rs752363939	C	G	p.Cys8Trp	p.Cys8Trp	c.24C>G	missense_variant		3.97659e-05
12049254	rs757982521	C	G	p.Ser10Cys	p.Ser10Cys	c.29C>G	missense_variant		3.97643e-06
12049257	rs777625403	T	C	p.Ile11Thr	p.Ile11Thr	c.32T>C	missense_variant	Uncertain significance/ Charcot-Marie-Tooth disease, type 2	3.97633e-06
12049256	rs763735861	A	G	p.Ile11Val	p.Ile11Val	c.31A>G	missense_variant	Uncertain significance/Charcot-Marie-Tooth disease, type 2	7.95273e-06
12049258	rs756450319	C	G	p.Ile11Met	p.Ile11Met	c.33C>G	missense_variant		7.95279e-06
12049257	rs777625403	T	G	p.Ile11Ser	p.Ile11Ser	c.32T>G	missense_variant	Uncertain significance/Charcot-Marie-Tooth disease, type 2	1.1929e-05
12049259	rs367715413	G	A	p.Val12Ile	p.Val12Ile	c.34G>A	missense_variant	Uncertain significance/Charcot-Marie-Tooth disease, type 2	1.41402e-05
12049268	rs778984789	A	G	p.Lys15Glu	p.Lys15Glu	c.43A>G	missense_variant		3.97633e-06
12049271	rs748233037	A	C	p.Lys16Gln	p.Lys16Gln	c.46A>C	missense_variant	Uncertain significance/Charcot-Marie-Tooth disease, type 2	7.95273e-06
12049274	rs772477199	A	G	p.Asn17Asp	p.Asn17Asp	c.49A>G	missense_variant		2.82805e-05
12049283	rs201715603	C	T	p.His20Tyr	p.His20Tyr	c.58C>T	missense_variant	Conflicting interpretations of pathogenicity/ Charcot-Marie-Tooth disease, type 2/Hereditary motor and sensory neuropathy with optic atrophy	7.06979e-05
12049289	rs1178355950	G	A	p.Ala22Thr	p.Ala22Thr	c.64G>A	missense_variant		3.97636e-06
12049301	rs1362917966	G	A	p.Ala26Thr	p.Ala26Thr	c.76G>A	missense_variant		3.97636e-06
12049305	rs775052063	C	T	p.Ser27Phe	p.Ser27Phe	c.80C>T	missense_variant		3.97633e-06
12049314	rs1303507580	A	G	p.Lys30Arg	p.Lys30Arg	c.89A>G	missense_variant		3.97624e-06
12049342	rs1288073943	C	G	p.Ile39Met	p.Ile39Met	c.117C>G	missense_variant		3.97633e-06
12049344	rs1354203259	A	G	p.Asn40Ser	p.Asn40Ser	c.119A>G	missense_variant	Uncertain significance/not provided	7.95267e-06
12049365	rs1263406133	G	C	p.Gly47Ala	p.Gly47Ala	c.140G>C	missense_variant		3.97652e-06
12049367	rs766706650	G	A	p.Ala48Thr	p.Ala48Thr	c.142G>A	missense_variant		3.97674e-06
12049371	rs754303535	A	G	p.Tyr49Cys	p.Tyr49Cys	c.146A>G	missense_variant		3.97659e-06
12049383	rs748283840	G	A	p.Ser53Asn	p.Ser53Asn	c.158G>A	missense_variant		3.97779e-06
12049384	rs61733200	C	G	p.Ser53Arg	p.Ser53Arg	c.159C>G	missense_variant	Uncertain significance/Charcot-Marie-Tooth disease, type 2/Hereditary motor and sensory neuropathy with optic atrophy	3.97848e-06
12049386	rs747176196	C	T	p.Ala54Val	p.Ala54Val	c.161C>T	missense_variant		1.59129e-05
12049385	rs61733203	G	A	p.Ala54Thr	p.Ala54Thr	c.160G>A	missense_variant	Uncertain significance/Charcot-Marie-Tooth disease, type 2	2.82969e-05
12049388	rs776423551	A	T	p.Thr55Ser	p.Thr55Ser	c.163A>T	missense_variant	Uncertain significance/ Charcot-Marie-Tooth disease, type 2	7.9571e-06
12049400	rs1311434220	G	T	p.Asp59Tyr	p.Asp59Tyr	c.175G>T	missense_variant	Uncertain significance/ Charcot-Marie-Tooth disease, type 2	7.9621e-06
12052615	rs138345244	C	T	p.Thr60Met	p.Thr60Met	c.179C>T	missense_variant	Conflicting interpretations of pathogenicity/ Charcot-Marie-Tooth disease, type 2/Hereditary motor and sensory neuropathy with optic atrophy	4.59536e-05
12052623	rs761216583	A	C	p.Asn63His	p.Asn63His	c.187A>C	missense_variant	Uncertain significance/ Not provided	4.37386e-05
12052626	rs922058129	G	A	p.Ala64Thr	p.Ala64Thr	c.190G>A	missense_variant		1.19289e-05
12052629	rs1415276772	G	C	p.Glu65Gln	p.Glu65Gln	c.193G>C	missense_variant		3.97621e-06
12052631	rs1297357606	A	C	p.Glu65Asp	p.Glu65Asp	c.195A>C	missense_variant		3.97621e-06
12052641	rs28940296	G	A	p.Val69Ile	p.Val69Ile	c.205G>A	missense_variant	Likely benign/ Charcot-Marie-Tooth disease, type 2	3.88844e-05
12052647	rs548809273	A	G	p.Thr71Ala	p.Thr71Ala	c.211A>G	missense_variant	Uncertain significance/ Charcot-Marie-Tooth disease, type 2	3.97621e-06
12052662	rs1218698482	C	A	p.Leu76Met	p.Leu76Met	c.226C>A	missense_variant		3.97621e-06
12052663	rs28940293	T	G	p.Leu76Arg	p.Leu76Arg	c.227T>G	missense_variant	Uncertain significance/ Not provided	7.95241e-06
12052668	rs764695837	G	A	p.Val78Ile	p.Val78Ile	c.232G>A	missense_variant	Uncertain significance/ Not provided	3.97621e-06
12052672	rs1262941514	A	G	p.Lys79Arg	p.Lys79Arg	c.236A>G	missense_variant	Uncertain significance/ Charcot-Marie-Tooth disease, type 2	7.95241e-06
12052675	rs139827903	G	C	p.Gly80Ala	p.Gly80Ala	c.239G>C	missense_variant	Uncertain significance/ Charcot-Marie-Tooth disease	7.06974e-06
12052675	rs139827903	G	T	p.Gly80Val	p.Gly80Val	c.239G>T	missense_variant	Uncertain significance/ Charcot-Marie-Tooth disease	2.12092e-05
12052674	rs1279715181	G	A	p.Gly80Ser	p.Gly80Ser	c.238G>A	missense_variant		3.18492e-05
12052684	rs372451582	C	G	p.Ser83Cys	p.Ser83Cys	c.248C>G	missense_variant	Uncertain significance/ Not provided	3.97621e-06
12052696	rs1435275513	G	A	p.Gly87Asp	p.Gly87Asp	c.260G>A	missense_variant		3.97621e-06
12052695	rs750571681	G	A	p.Gly87Ser	p.Gly87Ser	c.259G>A	missense_variant		7.95241e-06
12052717	rs28940291	G	A	p.Arg94Gln	p.Arg94Gln	c.281G>A	missense_variant	Pathogenic/ Charcot-Marie-Tooth disease, type 2	3.9763e-06
12052724	rs779756767	C	G	p.His96Gln	p.His96Gln	c.288C>G	missense_variant		3.97624e-06
12052724	rs779756767	C	A	p.His96Gln	p.His96Gln	c.288C>A	missense_variant	Uncertain significance/ Charcot-Marie-Tooth disease, type 2	3.18532e-05
12052726	rs1320589060	T	A	p.Met97Lys	p.Met97Lys	c.290T>A	missense_variant		3.97624e-06
12052725	rs754966288	A	G	p.Met97Val	p.Met97Val	c.289A>G	missense_variant		3.97627e-06
12056235	rs757937208	G	A	p.Val112Met	p.Val112Met	c.334G>A	missense_variant	Pathogenic/Likely pathogenic/ Charcot-Marie-Tooth disease, axonal, autosomal recessive, type 2A2B	1.59055e-05
12056238	rs1207767404	A	G	p.Ile113Val	p.Ile113Val	c.337A>G	missense_variant		3.97636e-06
12056255	rs777076965	G	T	p.Trp118Cys	p.Trp118Cys	c.354G>T	missense_variant		3.97643e-06
12056257	rs1235785061	A	T	p.Asp119Val	p.Asp119Val	c.356A>T	missense_variant		3.97643e-06
12056263	rs1420813419	T	G	p.Val121Gly	p.Val121Gly	c.362T>G	missense_variant		3.97636e-06
12056290	rs1344156837	C	T	p.Thr130Ile	p.Thr130Ile	c.389C>T	missense_variant		3.18532e-05
12056293	rs776404901	A	G	p.Asn131Ser	p.Asn131Ser	c.392A>G	missense_variant	Conflicting interpretations of pathogenicity/ Charcot-Marie-Tooth disease	3.97636e-06
12056305	rs1443036026	G	A	p.Arg135Gln	p.Arg135Gln	c.404G>A	missense_variant	Uncertain significance/ Charcot-Marie-Tooth disease, axonal, autosomal recessive, type 2A2B	3.18512e-05
12056311	rs1398128055	A	G	p.Glu137Gly	p.Glu137Gly	c.410A>G	missense_variant		3.97646e-06
12056317	rs762169547	C	T	p.Thr139Ile	p.Thr139Ile	c.416C>T	missense_variant		3.97649e-06
12056317	rs762169547	C	G	p.Thr139Arg	p.Thr139Arg	c.416C>G	missense_variant		3.97649e-06
12056321	rs767640801	T	G	p.Asp140Glu	p.Asp140Glu	c.420T>G	missense_variant		3.97655e-06
12056329	rs773222120	A	C	p.Glu143Ala	p.Glu143Ala	c.428A>C	missense_variant		3.97678e-06
12056334	rs760721051	T	C	p.Phe145Leu	p.Phe145Leu	c.433T>C	missense_variant		3.97703e-06
12056346	rs754016178	G	A	p.Glu149Lys	p.Glu149Lys	c.445G>A	missense_variant	Uncertain significance/ Charcot-Marie-Tooth disease, type 2	7.95602e-06
12056370	rs764880166	G	A	p.Ala157Thr	p.Ala157Thr	c.469G>A	missense_variant		7.96121e-06
12057365	rs975073098	G	C	p.Gln162His	p.Gln162His	c.486G>C	missense_variant		3.97845e-06
12057403	rs370569875	C	T	p.Ala175Val	p.Ala175Val	c.524C>T	missense_variant		7.9533e-06
12057417	rs756851126	A	C	p.Ser180Arg	p.Ser180Arg	c.538A>C	missense_variant	Uncertain significance/ Charcot-Marie-Tooth disease, type 2	1.5906e-05
12057420	rs863224064	G	A	p.Val181Met	p.Val181Met	c.541G>A	missense_variant	Conflicting interpretations of pathogenicity/ Charcot-Marie-Tooth disease, type 2	3.97646e-06
12057423	rs1338701016	A	G	p.Met182Val	p.Met182Val	c.544A>G	missense_variant		3.18451e-05
12057428	rs374340426	G	T	p.Trp183Cys	p.Trp183Cys	c.549G>T	missense_variant		3.97662e-06
12057434	rs755790687	C	G	p.Asn185Lys	p.Asn185Lys	c.555C>G	missense_variant		3.97655e-06
12058834	rs757817139	A	G	p.Ile203Val	p.Ile203Val	c.607A>G	missense_variant		3.97624e-06
12058835	rs200715905	T	C	p.Ile203Thr	p.Ile203Thr	c.608T>C	missense_variant	Uncertain significance/not provided	1.76783e-05
12058837	rs781651055	G	A	p.Asp204Asn	p.Asp204Asn	c.610G>A	missense_variant	Uncertain significance/ Charcot-Marie-Tooth disease, type 2	1.59048e-05
12058871	rs769882113	A	C	p.Lys215Thr	p.Lys215Thr	c.644A>C	missense_variant		3.97621e-06
12058874	rs387906990	T	C	p.Phe216Ser	p.Phe216Ser	c.647T>C	missense_variant	Pathogenic/Likely pathogenic/ Charcot-Marie-Tooth disease, type 2	1.06051e-05
12058934	rs773159585	C	T	p.Thr236Met	p.Thr236Met	c.707C>T	missense_variant	Pathogenic/Likely pathogenic/ Charcot-Marie-Tooth disease, type 2A2/Distal lower limb amyotrophy Distal muscle weakness Peripheral axonal neuropathy	7.95298e-06
12059057	rs879253924	T	C	p.Phe241Leu	p.Phe241Leu	c.721T>C	missense_variant		3.18512e-05
12059075	rs369948853	C	T	p.Arg247Cys	p.Arg247Cys	c.739C>T	missense_variant	Uncertain significance/ Charcot-Marie-Tooth disease, type 2	1.41404e-05
12059076	rs762189054	G	A	p.Arg247His	p.Arg247His	c.740G>A	missense_variant	Uncertain significance/ Charcot-Marie-Tooth disease, type 2	1.9881e-05
12059084	rs373107074	C	T	p.Arg250Trp	p.Arg250Trp	c.748C>T	missense_variant	Pathogenic/Likely pathogenic/ Charcot-Marie-Tooth disease	1.41398e-05
12059085	rs140234726	G	A	p.Arg250Gln	p.Arg250Gln	c.749G>A	missense_variant	Conflicting interpretations of pathogenicity/ Charcot-Marie-Tooth disease, type 2	0.000219173
12059094	rs1267396322	T	C	p.Ile253Thr	p.Ile253Thr	c.758T>C	missense_variant		3.18593e-05
12059099	rs1362725350	A	C	p.Ile255Leu	p.Ile255Leu	c.763A>C	missense_variant		7.95254e-06
12059101	rs376327713	C	G	p.Ile255Met	p.Ile255Met	c.765C>G	missense_variant	Uncertain significance/ Charcot-Marie-Tooth disease, type 2	1.76746e-05
12059112	rs755065651	G	T	p.Arg259Leu	p.Arg259Leu	c.776G>T	missense_variant	Pathogenic/ Charcot-Marie-Tooth disease, type 2, Charcot-Marie-Tooth disease	3.97627e-06
12059112	rs755065651	G	A	p.Arg259His	p.Arg259His	c.776G>A	missense_variant	Pathogenic/ Charcot-Marie-Tooth disease, type 2, Charcot-Marie-Tooth disease	3.97627e-06
12059121	rs949501949	C	T	p.Ala262Val	p.Ala262Val	c.785C>T	missense_variant		3.97624e-06
12059123	rs1283917064	T	G	p.Ser263Ala	p.Ser263Ala	c.787T>G	missense_variant		3.97627e-06
12059126	rs1444952735	G	A	p.Ala264Thr	p.Ala264Thr	c.790G>A	missense_variant		7.95267e-06
12059138	rs1453267972	G	A	p.Glu268Lys	p.Glu268Lys	c.802G>A	missense_variant	Uncertain significance/not provided	3.9764e-06
12059138	rs1453267972	G	C	p.Glu268Gln	p.Glu268Gln	c.802G>C	missense_variant		3.9764e-06
12059144	rs748318825	A	T	p.Met270Leu	p.Met270Leu	c.808A>T	missense_variant		3.9763e-06
12059144	rs748318825	A	C	p.Met270Leu	p.Met270Leu	c.808A>C	missense_variant		3.9763e-06
12059144	rs748318825	A	G	p.Met270Val	p.Met270Val	c.808A>G	missense_variant		7.9526e-06
12059145	rs771996573	T	C	p.Met270Thr	p.Met270Thr	c.809T>C	missense_variant	Uncertain significance/ Charcot-Marie-Tooth disease, type 2	1.59053e-05
12061461	rs762440627	C	T	p.Arg274Trp	p.Arg274Trp	c.820C>T	missense_variant		1.59996e-05
12061462	rs768407445	G	A	p.Arg274Gln	p.Arg274Gln	c.821G>A	missense_variant	Uncertain significance/Charcot-Marie-Tooth disease	2.4859e-05
12061464	rs368499636	C	T	p.Arg275Trp	p.Arg275Trp	c.823C>T	missense_variant	Uncertain significance/not provided	1.19904e-05
12061465	rs560470663	G	A	p.Arg275Gln	p.Arg275Gln	c.824G>A	missense_variant	Uncertain significance/Charcot-Marie-Tooth disease, type 2	1.5988e-05
12061473	rs529224795	A	G	p.Met278Val	p.Met278Val	c.832A>G	missense_variant		3.99476e-06
12061480	rs28940294	G	A	p.Arg280His	p.Arg280His	c.839G>A	missense_variant	Pathogenic/ Charcot-Marie-Tooth disease, type 2A2A	3.99537e-06
12061479	rs879253957	C	G	p.Arg280Gly	p.Arg280Gly	c.838C>G	missense_variant		3.9969e-06
12061483	rs147136530	G	C	p.Cys281Ser	p.Cys281Ser	c.842G>C	missense_variant	Conflicting interpretations of pathogenicity/ Charcot-Marie-Tooth disease, axonal, autosomal recessive, type 2A2B	0.000367348
12061485	rs1475014336	A	G	p.Thr282Ala	p.Thr282Ala	c.844A>G	missense_variant		7.98505e-06
12061489	rs1404069554	G	C	p.Ser283Thr	p.Ser283Thr	c.848G>C	missense_variant		3.18512e-05
12061498	rs765825496	T	G	p.Val286Gly	p.Val286Gly	c.857T>G	missense_variant		1.59674e-05
12061498	rs765825496	T	C	p.Val286Ala	p.Val286Ala	c.857T>C	missense_variant		2.12835e-05
12061522	rs371982971	G	A	p.Arg294Gln	p.Arg294Gln	c.881G>A	missense_variant		3.98622e-06
12061528	rs751685400	A	G	p.Gln296Arg	p.Gln296Arg	c.887A>G	missense_variant		1.41635e-05
12061533	rs41278630	G	A	p.Gly298Arg	p.Gly298Arg	c.892G>A	missense_variant	Conflicting interpretations of pathogenicity/Charcot-Marie-Tooth disease, type 2/Hereditary motor and sensory neuropathy with optic atrophy	0.00214706
12061540	rs1226075443	G	A	p.Arg300His	p.Arg300His	c.899G>A	missense_variant		1.19554e-05
12061566	rs1341422306	G	T	p.Val309Leu	p.Val309Leu	c.925G>T	missense_variant		3.97807e-06
12061567	rs1196253095	T	C	p.Val309Ala	p.Val309Ala	c.926T>C	missense_variant		3.97814e-06
12061574	rs150857365	C	A	p.Asn311Lys	p.Asn311Lys	c.933C>A	missense_variant		3.97772e-06
12061573	rs748838916	A	G	p.Asn311Ser	p.Asn311Ser	c.932A>G	missense_variant		7.95545e-06
12061575	rs774062558	G	A	p.Ala312Thr	p.Ala312Thr	c.934G>A	missense_variant		7.95513e-06
12061587	rs1424551887	A	G	p.Lys316Glu	p.Lys316Glu	c.946A>G	missense_variant	Uncertain significance/not provided	3.97731e-06
12061603	rs1371360768	C	T	p.Pro321Leu	p.Pro321Leu	c.962C>T	missense_variant		3.97753e-06
12061829	rs1386579410	G	T	p.Gly325Val	p.Gly325Val	c.974G>T	missense_variant		3.9763e-06
12061831	rs1324564667	G	A	p.Ala326Thr	p.Ala326Thr	c.976G>A	missense_variant		3.97643e-06
12061832	rs778350613	C	T	p.Ala326Val	p.Ala326Val	c.977C>T	missense_variant	Uncertain significance/ Charcot-Marie-Tooth disease, type 2	1.59057e-05
12061837	rs771900151	G	T	p.Ala328Ser	p.Ala328Ser	c.982G>T	missense_variant		3.97649e-06
12061853	rs540430409	T	G	p.Val333Gly	p.Val333Gly	c.998T>G	missense_variant		3.97633e-06
12061853	rs540430409	T	C	p.Val333Ala	p.Val333Ala	c.998T>C	missense_variant		3.97633e-06
12061859	rs1259172565	T	C	p.Met335Thr	p.Met335Thr	c.1004T>C	missense_variant		3.97627e-06
12061865	rs1486939209	A	T	p.Glu337Val	p.Glu337Val	c.1010A>T	missense_variant		3.97636e-06
12062061	rs1057518235	T	C	p.Val354Ala	p.Val354Ala	c.1061T>C	missense_variant	Uncertain significance/not provided	1.5905e-05
12062064	rs143747551	A	G	p.Lys355Arg	p.Lys355Arg	c.1064A>G	missense_variant	Uncertain significance/ Charcot-Marie-Tooth disease, type 2	3.18492e-05
12062085	rs387906991	C	T	p.Thr362Met	p.Thr362Met	c.1085C>T	missense_variant	Pathogenic/Likely pathogenic/ Charcot-Marie-Tooth disease, type 2, Charcot-Marie-Tooth disease	3.18136e-05
12062088	rs774895136	T	G	p.Val363Gly	p.Val363Gly	c.1088T>G	missense_variant		3.97621e-06
12062087	rs769096722	G	T	p.Val363Phe	p.Val363Phe	c.1087G>T	missense_variant		1.59048e-05
12062094	rs868500000	C	T	p.Ala365Val	p.Ala365Val	c.1094C>T	missense_variant		3.97621e-06
12062101	rs373211062	G	C	p.Gln367His	p.Gln367His	c.1101G>C	missense_variant	Uncertain significance/ Charcot-Marie-Tooth disease, type 2	0.000103381
12062104	rs1483584973	T	G	p.Ile368Met	p.Ile368Met	c.1104T>G	missense_variant		3.97621e-06
12062109	rs773424124	A	G	p.Glu370Gly	p.Glu370Gly	c.1109A>G	missense_variant		3.9763e-06
12062108	rs377402479	G	C	p.Glu370Gln	p.Glu370Gln	c.1108G>C	missense_variant	Uncertain significance/ Charcot-Marie-Tooth disease, type 2	1.41394e-05
12062112	rs201675158	C	T	p.Ala371Val	p.Ala371Val	c.1112C>T	missense_variant	Uncertain significance/ Charcot-Marie-Tooth disease, type 2	1.98815e-05
12062118	rs142042485	G	A	p.Arg373Gln	p.Arg373Gln	c.1118G>A	missense_variant	Uncertain significance/ Charcot-Marie-Tooth disease, type 2	7.95273e-06
12062126	rs863224967	A	T	p.Met376Leu	p.Met376Leu	c.1126A>T	missense_variant		3.97627e-06
12062133	rs1371006382	C	A	p.Ser378Tyr	p.Ser378Tyr	c.1133C>A	missense_variant		3.97643e-06
12062138	rs1433849760	C	T	p.His380Tyr	p.His380Tyr	c.1138C>T	missense_variant	Uncertain significance/Charcot-Marie-Tooth disease	3.97652e-06
12062145	rs201165591	C	T	p.Ala382Val	p.Ala382Val	c.1145C>T	missense_variant	Uncertain significance/not provided	3.97665e-06
12062151	rs565042936	G	A	p.Arg384Gln	p.Arg384Gln	c.1151G>A	missense_variant	Uncertain significance/not provided	3.97706e-06
12062150	rs777353788	C	T	p.Arg384Trp	p.Arg384Trp	c.1150C>T	missense_variant	Uncertain significance/Charcot-Marie-Tooth disease	3.18194e-05
12064050	rs924011766	G	A	p.Val388Ile	p.Val388Ile	c.1162G>A	missense_variant	Uncertain significance/Charcot-Marie-Tooth disease, type 2	1.19289e-05
12064059	rs756800190	G	A	p.Glu391Lys	p.Glu391Lys	c.1171G>A	missense_variant		2.78341e-05
12064062	rs767111551	G	A	p.Glu392Lys	p.Glu392Lys	c.1174G>A	missense_variant	Uncertain significance/not provided	2.78341e-05
12064067	rs12069578	G	C	p.Met393Ile	p.Met393Ile	c.1179G>C	missense_variant		1.59052e-05
12064067	rs12069578	G	A	p.Met393Ile	p.Met393Ile	c.1179G>A	missense_variant	Benign/Likely benign/Charcot-Marie-Tooth disease, type 2	0.000498402
12064068	rs186448929	C	T	p.Arg394Cys	p.Arg394Cys	c.1180C>T	missense_variant	Uncertain significance/Charcot-Marie-Tooth disease, type 2	2.3858e-05
12064069	rs538243357	G	A	p.Arg394His	p.Arg394His	c.1181G>A	missense_variant	Uncertain significance/Charcot-Marie-Tooth disease, type 2	6.75982e-05
12064078	rs778219078	G	A	p.Arg397Gln	p.Arg397Gln	c.1190G>A	missense_variant	Uncertain significance/not provided	7.95279e-06
12064077	rs758948968	C	T	p.Arg397Trp	p.Arg397Trp	c.1189C>T	missense_variant	Uncertain significance/Charcot-Marie-Tooth disease, type 2	1.59051e-05
12064082	rs555006809	A	C	p.Gln398His	p.Gln398His	c.1194A>C	missense_variant		3.9763e-06
12064087	rs138072432	G	A	p.Arg400Gln	p.Arg400Gln	c.1199G>A	missense_variant		7.42317e-05
12064090	rs1161492440	T	G	p.Leu401Arg	p.Leu401Arg	c.1202T>G	missense_variant	Uncertain significance/not provided	3.9763e-06
12064092	rs1389440695	A	C	p.Lys402Gln	p.Lys402Gln	c.1204A>C	missense_variant		7.06969e-06
12064096	rs769905428	T	G	p.Phe403Cys	p.Phe403Cys	c.1208T>G	missense_variant		1.1929e-05
12064098	rs775483521	A	G	p.Ile404Val	p.Ile404Val	c.1210A>G	missense_variant		1.41393e-05
12064101	rs1333249068	G	A	p.Asp405Asn	p.Asp405Asn	c.1213G>A	missense_variant		3.97633e-06
12064106	rs1437640665	A	T	p.Lys406Asn	p.Lys406Asn	c.1218A>T	missense_variant		3.97633e-06
12064115	rs764170470	G	T	p.Glu409Asp	p.Glu409Asp	c.1227G>T	missense_variant		3.9764e-06
12064113	rs370736142	G	C	p.Glu409Gln	p.Glu409Gln	c.1225G>C	missense_variant		3.18147e-05
12064126	rs375335641	A	C	p.Gln413Pro	p.Gln413Pro	c.1238A>C	missense_variant		1.19291e-05
12064141	rs766998571	G	A	p.Arg418Gln	p.Arg418Gln	c.1253G>A	missense_variant		7.95323e-06
12064145	rs749893944	T	G	p.Ile419Met	p.Ile419Met	c.1257T>G	missense_variant	Uncertain significance/ Charcot-Marie-Tooth disease, type 2	1.59062e-05
12064151	rs755850497	G	T	p.Gln421His	p.Gln421His	c.1263G>T	missense_variant		2.82799e-05
12064155	rs765921889	A	G	p.Thr423Ala	p.Thr423Ala	c.1267A>G	missense_variant	Uncertain significance/Charcot-Marie-Tooth disease, type 2	1.19301e-05
12064570	rs764374251	C	T	p.Ser431Leu	p.Ser431Leu	c.1292C>T	missense_variant	Uncertain significance/Charcot-Marie-Tooth disease, type 2	7.9526e-06
12064578	rs1460427784	A	G	p.Met434Val	p.Met434Val	c.1300A>G	missense_variant		3.1841e-05
12064582	rs1030984908	C	G	p.Ala435Gly	p.Ala435Gly	c.1304C>G	missense_variant	Uncertain significance/not provided	7.95241e-06
12064584	rs1011639786	G	A	p.Glu436Lys	p.Glu436Lys	c.1306G>A	missense_variant		3.97621e-06
12064593	rs565645338	A	G	p.Arg439Gly	p.Arg439Gly	c.1315A>G	missense_variant		3.97621e-06
12064595	rs1226682845	G	T	p.Arg439Ser	p.Arg439Ser	c.1317G>T	missense_variant		3.97624e-06
12064597	rs958009351	G	A	p.Arg440His	p.Arg440His	c.1319G>A	missense_variant		1.19286e-05
12064596	rs756110507	C	T	p.Arg440Cys	p.Arg440Cys	c.1318C>T	missense_variant	Uncertain significance/not provided	2.47455e-05
12064602	rs1415810343	T	C	p.Ser442Pro	p.Ser442Pro	c.1324T>C	missense_variant		3.18512e-05
12064605	rs780450613	G	C	p.Val443Leu	p.Val443Leu	c.1327G>C	missense_variant		3.97621e-06
12064605	rs780450613	G	A	p.Val443Ile	p.Val443Ile	c.1327G>A	missense_variant	Uncertain significance/Charcot-Marie-Tooth disease, type 2	1.414e-05
12064616	rs376300393	C	A	p.Asp446Glu	p.Asp446Glu	c.1338C>A	missense_variant		3.97621e-06
12064626	rs747870255	A	G	p.Met450Val	p.Met450Val	c.1348A>G	missense_variant		3.97621e-06
12064635	rs140027579	C	T	p.His453Tyr	p.His453Tyr	c.1357C>T	missense_variant		3.97621e-06
12064644	rs772083521	C	A	p.Pro456Thr	p.Pro456Thr	c.1366C>A	missense_variant		3.97621e-06
12064645	rs78658090	C	T	p.Pro456Leu	p.Pro456Leu	c.1367C>T	missense_variant		7.95241e-06
12064659	rs1464268222	G	T	p.Val461Phe	p.Val461Phe	c.1381G>T	missense_variant		3.97621e-06
12064884	rs372129644	G	C	p.Glu465Asp	p.Glu465Asp	c.1395G>C	missense_variant		3.99205e-06
12064891	rs746852710	C	T	p.Arg468Cys	p.Arg468Cys	c.1402C>T	missense_variant		3.98963e-06
12064892	rs138382758	G	A	p.Arg468His	p.Arg468His	c.1403G>A	missense_variant	Conflicting interpretations of pathogenicity/Charcot-Marie-Tooth disease, type 2A2A/Hereditary motor and sensory neuropathy with optic atrophy	0.0021768
12064897	rs776174992	A	G	p.Ile470Val	p.Ile470Val	c.1408A>G	missense_variant	Uncertain significance/not provided	3.98533e-06
12064898	rs1405631056	T	C	p.Ile470Thr	p.Ile470Thr	c.1409T>C	missense_variant		3.18552e-05
12064903	rs769478268	G	A	p.Glu472Lys	p.Glu472Lys	c.1414G>A	missense_variant		1.41721e-05
12064913	rs774967287	G	A	p.Gly475Asp	p.Gly475Asp	c.1424G>A	missense_variant		7.97957e-06
12064916	rs1331318781	G	A	p.Arg476Gln	p.Arg476Gln	c.1427G>A	missense_variant		7.98046e-06
12064923	rs1209964847	G	A	p.Met478Ile	p.Met478Ile	c.1434G>A	missense_variant		3.9924e-06
12064930	rs762264240	C	T	p.Arg481Cys	p.Arg481Cys	c.1441C>T	missense_variant	Uncertain significance/Charcot-Marie-Tooth disease, type 2	4.00032e-06
12064931	rs767718891	G	A	p.Arg481His	p.Arg481His	c.1442G>A	missense_variant	Uncertain significance/not provided	1.06597e-05
12064940	rs375480365	C	T	p.Thr484Met	p.Thr484Met	c.1451C>T	missense_variant	Likely benign/not provide	5.34017e-05
12064942	rs1320374657	G	A	p.Ala485Thr	p.Ala485Thr	c.1453G>A	missense_variant	Uncertain significance/Charcot-Marie-Tooth disease	3.18431e-05
12064952	rs147785658	A	G	p.Asn488Ser	p.Asn488Ser	c.1463A>G	missense_variant	Uncertain significance/Charcot-Marie-Tooth disease, type 2	5.71461e-05
12064954	rs765516646	T	C	p.Ser489Pro	p.Ser489Pro	c.1465T>C	missense_variant		4.02842e-06
12064966	rs758215379	A	G	p.Met493Val	p.Met493Val	c.1477A>G	missense_variant		7.26074e-06
12064966	rs758215379	A	C	p.Met493Leu	p.Met493Leu	c.1477A>C	missense_variant		8.19538e-06
12064969	rs141775063	C	A	p.Gln494Lys	p.Gln494Lys	c.1480C>A	missense_variant	Uncertain significance/Charcot-Marie-Tooth disease, type 2	2.55182e-05
12064973	rs1229090521	A	G	p.Gln495Arg	p.Gln495Arg	c.1484A>G	missense_variant		8.36057e-06
12064979	rs1320461934	T	C	p.Met497Thr	p.Met497Thr	c.1490T>C	missense_variant		4.20225e-06
12064980	rs201240407	G	A	p.Met497Ile	p.Met497Ile	c.1491G>A	missense_variant		8.43362e-06
12064982	rs781077681	T	C	p.Ile498Thr	p.Ile498Thr	c.1493T>C	missense_variant		1.27275e-05
12064984	rs1238742091	G	C	p.Asp499His	p.Asp499His	c.1495G>C	missense_variant		3.1839e-05
12065771	rs1209668629	G	A	p.Gly500Asp	p.Gly500Asp	c.1499G>A	missense_variant		3.97649e-06
12065771	rs1209668629	G	C	p.Gly500Ala	p.Gly500Ala	c.1499G>C	missense_variant		7.95298e-06
12065777	rs752815198	A	T	p.Lys502Ile	p.Lys502Ile	c.1505A>T	missense_variant		3.97636e-06
12065792	rs764354760	T	C	p.Val507Ala	p.Val507Ala	c.1520T>C	missense_variant		3.97627e-06
12065795	rs138660745	C	G	p.Ser508Cys	p.Ser508Cys	c.1523C>G	missense_variant		1.41396e-05
12065794	rs751397699	T	A	p.Ser508Thr	p.Ser508Thr	c.1522T>A	missense_variant	Uncertain significance/Charcot-Marie-Tooth disease, type 2	1.76748e-05
12065797	rs945014959	G	C	p.Val509Leu	p.Val509Leu	c.1525G>C	missense_variant		3.97624e-06
12065800	rs146092040	C	G	p.Arg510Gly	p.Arg510Gly	c.1528C>G	missense_variant		3.9763e-06
12065800	rs146092040	C	T	p.Arg510Trp	p.Arg510Trp	c.1528C>T	missense_variant	Uncertain significance/Charcot-Marie-Tooth disease, type 2	3.57867e-05
12065801	rs376598131	G	A	p.Arg510Gln	p.Arg510Gln	c.1529G>A	missense_variant	Benign/Likely benign/Charcot-Marie-Tooth disease, type 2	0.000339367
12065809	rs755657087	A	G	p.Ile513Val	p.Ile513Val	c.1537A>G	missense_variant	Uncertain significance/Charcot-Marie-Tooth disease, type 2	1.41398e-05
12065819	rs779500620	T	C	p.Leu516Pro	p.Leu516Pro	c.1547T>C	missense_variant		3.97621e-06
12065822	rs1303464284	T	G	p.Val517Gly	p.Val517Gly	c.1550T>G	missense_variant		3.97621e-06
12065824	rs748821899	C	T	p.Pro518Ser	p.Pro518Ser	c.1552C>T	missense_variant		3.97621e-06
12065824	rs748821899	C	G	p.Pro518Ala	p.Pro518Ala	c.1552C>G	missense_variant		3.97621e-06
12065827	rs369140232	C	G	p.Arg519Gly	p.Arg519Gly	c.1555C>G	missense_variant		3.97621e-06
12065828	rs373809750	G	A	p.Arg519His	p.Arg519His	c.1556G>A	missense_variant	Uncertain significance/ Charcot-Marie-Tooth disease	3.97621e-06
12065827	rs369140232	C	T	p.Arg519Cys	p.Arg519Cys	c.1555C>T	missense_variant	Likely pathogenic/Charcot-Marie-Tooth disease, type 2A2A	1.59048e-05
12065836	rs747397065	T	G	p.Phe522Val	p.Phe522Val	c.1564T>G	missense_variant		3.97621e-06
12065836	rs747397065	T	C	p.Phe522Leu	p.Phe522Leu	c.1564T>C	missense_variant		3.97621e-06
12065846	rs145654854	A	G	p.Asn525Ser	p.Asn525Ser	c.1574A>G	missense_variant	Uncertain significance/Charcot-Marie-Tooth disease, type 2	0.000169675
12065849	rs760184781	A	G	p.Tyr526Cys	p.Tyr526Cys	c.1577A>G	missense_variant		3.97621e-06
12065879	rs190705310	A	C	p.Asp536Ala	p.Asp536Ala	c.1607A>C	missense_variant		3.97621e-06
12065883	rs201099655	C	G	p.Phe537Leu	p.Phe537Leu	c.1611C>G	missense_variant		3.57859e-05
12065894	rs1453557988	T	C	p.Ile541Thr	p.Ile541Thr	c.1622T>C	missense_variant		3.97627e-06
12065899	rs761612104	T	C	p.Phe543Leu	p.Phe543Leu	c.1627T>C	missense_variant		3.97621e-06
12065911	rs767236776	C	A	p.Leu547Ile	p.Leu547Ile	c.1639C>A	missense_variant		3.97624e-06
12065912	rs1416334489	T	C	p.Leu547Pro	p.Leu547Pro	c.1640T>C	missense_variant		3.97624e-06
12065914	rs373368672	G	A	p.Gly548Arg	p.Gly548Arg	c.1642G>A	missense_variant	Uncertain significance/Charcot-Marie-Tooth disease, type 2	3.18158e-05
12065914	rs373368672	G	C	p.Gly548Arg	p.Gly548Arg	c.1642G>C	missense_variant		3.97621e-05
12065919	rs1456182906	G	A	p.Trp549Ter	p.Trp549Ter	c.1647G>A	stop_gained		3.97621e-05
12065933	rs1323126060	A	G	p.Asn554Ser	p.Asn554Ser	c.1661A>G	missense_variant		3.97621e-06
12065936	rs1366486612	G	A	p.Arg555Lys	p.Arg555Lys	c.1664G>A	missense_variant		3.97621e-06
12065948	rs753317027	C	T	p.Pro559Leu	p.Pro559Leu	c.1676C>T	missense_variant		3.97627e-06
12065947	rs1369308807	C	T	p.Pro559Ser	p.Pro559Ser	c.1675C>T	missense_variant	Uncertain significance/not provided	7.95254e-06
12065951	rs754458177	A	G	p.Lys560Arg	p.Lys560Arg	c.1679A>G	missense_variant		7.9526e-06
12065950	rs1219515056	A	G	p.Lys560Glu	p.Lys560Glu	c.1678A>G	missense_variant		3.18512e-05
12065954	rs778719488	A	C	p.Asn561Thr	p.Asn561Thr	c.1682A>C	missense_variant		3.9763e-06
12065960	rs771845093	G	A	p.Arg563His	p.Arg563His	c.1688G>A	missense_variant		7.95273e-06
12065959	rs747733583	C	T	p.Arg563Cys	p.Arg563Cys	c.1687C>T	missense_variant	Uncertain significance/ Not provided	4.37397e-05
12065962	rs545454816	C	T	p.Arg564Trp	p.Arg564Trp	c.1690C>T	missense_variant		1.41408e-05
12065966	rs770243526	C	A	p.Ala565Asp	p.Ala565Asp	c.1694C>A	missense_variant	Uncertain significance/ Charcot-Marie-Tooth disease, type 2	3.97643e-06
12065966	rs770243526	C	T	p.Ala565Val	p.Ala565Val	c.1694C>T	missense_variant		3.18593e-05
12065973	rs776026191	G	A	p.Met567Ile	p.Met567Ile	c.1701G>A	missense_variant		1.19299e-05
12065974	rs1471660995	G	A	p.Gly568Ser	p.Gly568Ser	c.1702G>A	missense_variant		3.97668e-06
12065981	rs376925978	A	G	p.Asn570Ser	p.Asn570Ser	c.1709A>G	missense_variant	Uncertain significance/Charcot-Marie-Tooth disease, type 2	3.18201e-05
12065986	rs1405235272	C	G	p.Gln572Glu	p.Gln572Glu	c.1714C>G	missense_variant		7.95406e-06
12066595	rs370335693	G	A	p.Val573Ile	p.Val573Ile	c.1717G>A	missense_variant		3.97969e-06
12066599	rs763861738	A	G	p.Gln574Arg	p.Gln574Arg	c.1721A>G	missense_variant		3.97893e-06
12066602	rs564375950	G	A	p.Arg575His	p.Arg575His	c.1724G>A	missense_variant	Uncertain significance/ Charcot-Marie-Tooth disease	1.59142e-05
12066605	rs756441388	C	T	p.Pro576Leu	p.Pro576Leu	c.1727C>T	missense_variant		1.59132e-05
12066607	rs749606728	A	G	p.Ile577Val	p.Ile577Val	c.1729A>G	missense_variant	Uncertain significance/Charcot-Marie-Tooth disease, type 2	7.95558e-06
12066617	rs150304304	C	T	p.Thr580Met	p.Thr580Met	c.1739C>T	missense_variant		7.95507e-06
12066622	rs779366388	G	A	p.Ala582Thr	p.Ala582Thr	c.1744G>A	missense_variant		1.59103e-05
12066625	rs772078518	A	G	p.Asn583Asp	p.Asn583Asp	c.1747A>G	missense_variant		1.19315e-05
12066628	rs773308500	C	A	p.Pro584Thr	p.Pro584Thr	c.1750C>A	missense_variant	Uncertain significance	1.19313e-05
12066633	rs1335576013	C	G	p.Ser585Arg	p.Ser585Arg	c.1755C>G	missense_variant		3.97693e-06
12066636	rs1341015445	G	A	p.Met586Ile	p.Met586Ile	c.1758G>A	missense_variant		3.97716e-06
12066637	rs771675874	C	T	p.Pro587Ser	p.Pro587Ser	c.1759C>T	missense_variant	Uncertain significance	2.4747e-05
12066640	rs771043011	C	T	p.Pro588Ser	p.Pro588Ser	c.1762C>T	missense_variant		7.07039e-06
12066656	rs759372833	C	T	p.Ser593Leu	p.Ser593Leu	c.1778C>T	missense_variant		1.193e-05
12066658	rs1280803045	C	A	p.Leu594Ile	p.Leu594Ile	c.1780C>A	missense_variant		3.97662e-06
12066672	rs1188482908	G	T	p.Glu598Asp	p.Glu598Asp	c.1794G>T	missense_variant		3.97662e-06
12066679	rs775520170	G	T	p.Val601Phe	p.Val601Phe	c.1801G>T	missense_variant		3.97668e-06
12066694	rs149122641	G	A	p.Gly606Ser	p.Gly606Ser	c.1816G>A	missense_variant	Uncertain significance	1.0606e-05
12066713	rs755299545	C	T	p.Ser612Phe	p.Ser612Phe	c.1835C>T	missense_variant		3.97678e-06
12066717	rs1238734036	G	T	p.Arg613Ser	p.Arg613Ser	c.1839G>T	missense_variant		3.18573e-05
12066724	rs753132224	A	G	p.Met616Val	p.Met616Val	c.1846A>G	missense_variant		3.97684e-06
12066732	rs758899697	T	G	p.Ile618Met	p.Ile618Met	c.1854T>G	missense_variant		3.97716e-06
12066733		C	A	p.Leu619Ile	p.Leu619Ile	c.1855C>A	missense_variant		3.97716e-06
12066736	rs200936779	G	C	p.Val620Leu	p.Val620Leu	c.1858G>C	missense_variant		3.97728e-06
12066736	rs200936779	G	A	p.Val620Ile	p.Val620Ile	c.1858G>A	missense_variant	Uncertain significance	3.97728e-06
12067116	rs1163976600	A	G	p.Lys627Glu	p.Lys627Glu	c.1879A>G	missense_variant	Uncertain significance	3.97829e-06
12067119	rs145413511	G	A	p.Ala628Thr	p.Ala628Thr	c.1882G>A	missense_variant		7.07354e-06
12067131	rs772701127	C	T	p.Arg632Trp	p.Arg632Trp	c.1894C>T	missense_variant	Uncertain significance	3.9781e-06
12067132	rs760375604	G	A	p.Arg632Gln	p.Arg632Gln	c.1895G>A	missense_variant		1.19336e-05
12067143	rs765991120	C	T	p.Leu636Phe	p.Leu636Phe	c.1906C>T	missense_variant		3.97744e-06
12067146	rs763185826	T	A	p.Ser637Thr	p.Ser637Thr	c.1909T>A	missense_variant	Uncertain significance	1.19322e-05
12067155	rs764683093	C	A	p.Leu640Ile	p.Leu640Ile	c.1918C>A	missense_variant		3.97712e-06
12067156	rs1320373838	T	C	p.Leu640Pro	p.Leu640Pro	c.1919T>C	missense_variant		3.97716e-06
12067159	rs866276988	A	G	p.Tyr641Cys	p.Tyr641Cys	c.1922A>G	missense_variant		7.07159e-06
12067167	rs756456657	C	T	p.Leu644Phe	p.Leu644Phe	c.1930C>T	missense_variant		7.95361e-06
12067173	rs754683866	G	A	p.Val646Ile	p.Val646Ile	c.1936G>A	missense_variant	Uncertain significance	3.97684e-06
12067174	rs1392089408	T	C	p.Val646Ala	p.Val646Ala	c.1937T>C	missense_variant		3.18898e-05
12067177	rs988111658	A	G	p.Tyr647Cys	p.Tyr647Cys	c.1940A>G	missense_variant		3.97687e-06
12067182	rs778909367	C	T	p.Arg649Cys	p.Arg649Cys	c.1945C>T	missense_variant		7.95387e-06
12067183	rs763492075	G	A	p.Arg649His	p.Arg649His	c.1946G>A	missense_variant	Uncertain significance	1.98851e-05
12067189	rs746502519	C	G	p.Thr651Ser	p.Thr651Ser	c.1952C>G	missense_variant		3.97706e-06
12067188	rs772756022	A	G	p.Thr651Ala	p.Thr651Ala	c.1951A>G	missense_variant	Uncertain significance	7.95406e-06
12067197	rs770594602	A	G	p.Thr654Ala	p.Thr654Ala	c.1960A>G	missense_variant		3.97703e-06
12067198	rs776227002	C	A	p.Thr654Asn	p.Thr654Asn	c.1961C>A	missense_variant		3.97706e-06
12067212	rs529286489	A	G	p.Arg659Gly	p.Arg659Gly	c.1975A>G	missense_variant		3.97744e-06
12067213	rs863224063	G	A	p.Arg659Lys	p.Arg659Lys	c.1976G>A	missense_variant	Uncertain significance	1.06072e-05
12067215	rs762292163	G	A	p.Ala660Thr	p.Ala660Thr	c.1978G>A	missense_variant		7.95475e-06
12067224	rs369762154	C	G	p.Arg663Gly	p.Arg663Gly	c.1987C>G	missense_variant		3.97753e-06
12067225	rs766735605	G	A	p.Arg663His	p.Arg663His	c.1988G>A	missense_variant	Uncertain significance	1.19331e-05
12067225	rs766735605	G	T	p.Arg663Leu	p.Arg663Leu	c.1988G>T	missense_variant	Uncertain significance	1.41444e-05
12067224	rs369762154	C	T	p.Arg663Cys	p.Arg663Cys	c.1987C>T	missense_variant	Conflicting interpretations of pathogenicity	0.000169722
12067232	rs755219120	T	G	p.Phe665Leu	p.Phe665Leu	c.1995T>G	missense_variant		1.98897e-05
12067240	rs747947098	A	G	p.His668Arg	p.His668Arg	c.2003A>G	missense_variant		3.97817e-06
12067239	rs778643113	C	G	p.His668Asp	p.His668Asp	c.2002C>G	missense_variant		3.97833e-06
12067258	rs1410698026	A	C	p.Gln674Pro	p.Gln674Pro	c.2021A>C	missense_variant	Uncertain significance	3.97994e-06
12067257	rs770361817	C	A	p.Gln674Lys	p.Gln674Lys	c.2020C>A	missense_variant	Uncertain significance	1.06139e-05
12067260	rs531748892	C	T	p.Leu675Phe	p.Leu675Phe	c.2023C>T	missense_variant		3.98042e-06
12067266	rs745565182	A	T	p.Ile677Phe	p.Ile677Phe	c.2029A>T	missense_variant		3.98124e-06
12067273	rs769482622	A	G	p.Tyr679Cys	p.Tyr679Cys	c.2036A>G	missense_variant		3.98314e-06
12067285	rs762213417	A	G	p.Asn683Ser	p.Asn683Ser	c.2048A>G	missense_variant	Uncertain significance	1.19673e-05
12067297	rs879253910	A	G	p.Gln687Arg	p.Gln687Arg	c.2060A>G	missense_variant	Uncertain significance	1.19769e-05
12067299	rs771237190	G	C	p.Val688Leu	p.Val688Leu	c.2062G>C	missense_variant		3.99492e-06
12067305	rs1218249174	C	A	p.Gln690Lys	p.Gln690Lys	c.2068C>A	missense_variant		4.00157e-06
12069672	rs1060501916	A	G	p.His698Arg	p.His698Arg	c.2093A>G	missense_variant	Uncertain significance	3.97627e-06
12069693	rs1293645756	T	A	p.Val705Asp	p.Val705Asp	c.2114T>A	missense_variant		3.97627e-06
12069692	rs142271930	G	A	p.Val705Ile	p.Val705Ile	c.2113G>A	missense_variant	Benign/Likely benign	0.00686525
12069699	rs375937289	G	A	p.Arg707Gln	p.Arg707Gln	c.2120G>A	missense_variant		2.38572e-05
12069698	rs119103267	C	T	p.Arg707Trp	p.Arg707Trp	c.2119C>T	missense_variant	Pathogenic/Likely pathogenic	0.000250993
12069702		A	G	p.Glu708Gly	p.Glu708Gly	c.2123A>G	missense_variant		3.97621e-06
12069705	rs1251255682	A	T	p.Asn709Ile	p.Asn709Ile	c.2126A>T	missense_variant		3.97621e-06
12069719	rs779574187	A	G	p.Ile714Val	p.Ile714Val	c.2140A>G	missense_variant	Uncertain significance	3.97627e-06
12069720	rs370580356	T	C	p.Ile714Thr	p.Ile714Thr	c.2141T>C	missense_variant		7.95254e-06
12069726	rs771589792	C	T	p.Ala716Val	p.Ala716Val	c.2147C>T	missense_variant		2.121e-05
12069725	rs144860227	G	A	p.Ala716Thr	p.Ala716Thr	c.2146G>A	missense_variant	Conflicting interpretations of pathogenicity	0.000130795
12069737	rs1450205264	A	G	p.Lys720Glu	p.Lys720Glu	c.2158A>G	missense_variant	Uncertain significance	3.18451e-05
12069740	rs775419517	A	T	p.Ile721Phe	p.Ile721Phe	c.2161A>T	missense_variant		3.9763e-06
12069741	rs150946795	T	C	p.Ile721Thr	p.Ile721Thr	c.2162T>C	missense_variant	Uncertain significance	7.95273e-06
12069745	rs764268203	G	C	p.Glu722Asp	p.Glu722Asp	c.2166G>C	missense_variant		2.82791e-05
12069753	rs1445694373	A	T	p.Asp725Val	p.Asp725Val	c.2174A>T	missense_variant		3.97662e-06
12069761	rs761544980	C	A	p.Gln728Lys	p.Gln728Lys	c.2182C>A	missense_variant	Uncertain significance	2.47474e-05
12069764	rs1274191966	A	G	p.Ser729Gly	p.Ser729Gly	c.2185A>G	missense_variant		3.97728e-06
12069774	rs767383693	A	G	p.Lys732Arg	p.Lys732Arg	c.2195A>G	missense_variant		3.97785e-06
12069783	rs765967592	G	A	p.Arg735Lys	p.Arg735Lys	c.2204G>A	missense_variant		3.97956e-06
12071553	rs757975290	G	C	p.Arg735Ser	p.Arg735Ser	c.2205G>C	missense_variant		4.01436e-06
12069782	rs755588768	A	G	p.Arg735Gly	p.Arg735Gly	c.2203A>G	missense_variant		1.59156e-05
12071563	rs1402367279	G	A	p.Gly739Ser	p.Gly739Ser	c.2215G>A	missense_variant		6.3743e-05
12071569	rs1060501917	T	G	p.Leu741Val	p.Leu741Val	c.2221T>G	missense_variant	Pathogenic	4.0139e-06
12071586	rs780488977	C	G	p.Asn746Lys	p.Asn746Lys	c.2238C>G	missense_variant		4.01271e-06
12071587	rs1259403735	A	G	p.Met747Val	p.Met747Val	c.2239A>G	missense_variant		4.01262e-06
12071618	rs377146672	G	C	p.Arg757Thr	p.Arg757Thr	c.2270G>C	missense_variant		1.60408e-05
12071622	rs779118705	G	T	p.Ter758TyrextTer39	p.Ter758TyrextTer39	c.2274G>T	stop_lost		4.00982e-06
